# Supplementary material for: Ocular protein optineurin shows reversibility from unfolded states and exhibits chaperone-like activity
Source: Royal Society of Chemistry journal article supplement (doi:10.1039/d2ra07931c), 2023-01-01
Supplement: d2ra07931c1.pdf [file d2ra07931c1.pdf]

## SUPPLEMENTARY DATA

**Select Summary Report**

Format As:  [Help](#)

Significance threshold p< 0.05    Max. number of hits AUTO

Standard scoring  MudPIT scoring  Display non-significant matches  Show sub-sets 0

Show pop-ups  Suppress pop-ups     Require bold red

Preferred taxonomy All entries

Re-Search  All queries  Unassigned  Below homology threshold  Below identity threshold

1. **OPTN\_HUMAN**    Mass: 66287    Score: 10798    Matches: 327(327)    Sequences: 33(33)    emPAI: 11.95

Optineurin OS=Homo sapiens OX=9606 GN=OPTN PE=1 SV=3

| Query                | Observed | Mr(xcpt)  | Mr(calc)  | Delta   | Miss | Score | Expect   | Rank | Unique | Peptide                                                                                                                                                                                                                             |
|----------------------|----------|-----------|-----------|---------|------|-------|----------|------|--------|-------------------------------------------------------------------------------------------------------------------------------------------------------------------------------------------------------------------------------------|
| <a href="#">314</a>  | 431.2253 | 860.4361  | 860.4603  | -0.0242 | 0    | 35    | 0.043    | 1    | U      | K.TIEELTR.K                                                                                                                                                                                                                         |
| <a href="#">605</a>  | 460.7274 | 919.4403  | 919.4684  | -0.0281 | 0    | 55    | 0.00035  | 1    | U      | K.LSEALMK.K <a href="#">604</a> <a href="#">609</a> <a href="#">610</a>                                                                                                                                                             |
| <a href="#">684</a>  | 468.7319 | 935.4493  | 935.4633  | -0.0141 | 0    | (52)  | 0.00064  | 1    | U      | K.LSEALMK.K <a href="#">682</a> <a href="#">683</a>                                                                                                                                                                                 |
| <a href="#">801</a>  | 482.7584 | 963.5022  | 963.5237  | -0.0215 | 0    | 35    | 0.037    | 1    | U      | R.TVSTGALS.K.Y                                                                                                                                                                                                                      |
| <a href="#">996</a>  | 497.7584 | 993.5022  | 993.5131  | -0.0109 | 0    | 52    | 0.0006   | 1    | U      | K.QELVYTNK.K                                                                                                                                                                                                                        |
| <a href="#">1312</a> | 513.7618 | 1025.5090 | 1025.5182 | -0.0091 | 0    | 38    | 0.017    | 1    | U      | R.QFFEIQSK.E <a href="#">1292</a> <a href="#">1298</a> <a href="#">1306</a> <a href="#">1307</a> <a href="#">1310</a> <a href="#">1311</a>                                                                                          |
| <a href="#">2548</a> | 590.3232 | 1178.6317 | 1178.6407 | -0.0090 | 0    | 35    | 0.043    | 1    | U      | K.LLQEHNNALK.T                                                                                                                                                                                                                      |
| <a href="#">2595</a> | 396.5168 | 1186.5286 | 1186.5652 | -0.0366 | 0    | 38    | 0.019    | 1    | U      | R.LMALSHENEK.L                                                                                                                                                                                                                      |
| <a href="#">2733</a> | 601.3069 | 1200.5993 | 1200.5986 | 0.0007  | 0    | 77    | 2.6e-006 | 1    | U      | K.NSAIPSELNEK.Q <a href="#">2723</a> <a href="#">2724</a> <a href="#">2725</a> <a href="#">2727</a> <a href="#">2730</a> <a href="#">2734</a> <a href="#">2736</a> <a href="#">2737</a> <a href="#">2738</a> <a href="#">2740</a>   |
| <a href="#">2748</a> | 601.7944 | 1201.5742 | 1201.5826 | -0.0084 | 0    | (47)  | 0.0026   | 1    | U      | K.NSAIPSELNEK.Q <a href="#">2750</a>                                                                                                                                                                                                |
| <a href="#">3025</a> | 612.8285 | 1223.6424 | 1223.6510 | -0.0086 | 0    | 44    | 0.0045   | 1    | U      | K.ELLTENHQLK.E <a href="#">3039</a> <a href="#">3074</a>                                                                                                                                                                            |
| <a href="#">3090</a> | 613.3297 | 1224.6448 | 1224.6350 | 0.0099  | 0    | (36)  | 0.025    | 1    | U      | K.ELLTENHQLK.E <a href="#">3088</a>                                                                                                                                                                                                 |
| <a href="#">3229</a> | 620.2950 | 1238.5755 | 1238.5819 | -0.0064 | 0    | 63    | 5.3e-005 | 1    | U      | R.FEELSANTEK.Q <a href="#">3225</a> <a href="#">3226</a> <a href="#">3227</a> <a href="#">3231</a> <a href="#">3242</a> <a href="#">3246</a> <a href="#">3247</a> <a href="#">3249</a>                                              |
| <a href="#">3796</a> | 430.2276 | 1287.6609 | 1287.6921 | -0.0312 | 1    | (47)  | 0.0026   | 1    | U      | K.ELSEKLELAEK.A <a href="#">3786</a> <a href="#">3789</a> <a href="#">3790</a> <a href="#">3793</a> <a href="#">3795</a> <a href="#">3798</a> <a href="#">3803</a>                                                                  |
| <a href="#">3833</a> | 644.8571 | 1287.6996 | 1287.6921 | -0.0075 | 1    | 69    | 1.6e-005 | 1    | U      | K.ELSEKLELAEK.A <a href="#">3812</a> <a href="#">3814</a> <a href="#">3815</a> <a href="#">3827</a> <a href="#">3830</a> <a href="#">3834</a> <a href="#">3838</a> <a href="#">3841</a> <a href="#">3850</a> <a href="#">3851</a> ; |
| <a href="#">4054</a> | 439.5427 | 1315.6063 | 1315.6368 | -0.0304 | 1    | 49    | 0.0017   | 1    | U      | R.AEAQEKQLR.T <a href="#">398</a>                                                                                                                                                                                                   |
| <a href="#">4181</a> | 443.8963 | 1328.6669 | 1328.6935 | -0.0266 | 1    | (46)  | 0.0032   | 1    | U      | R.KNSAIPSELNEK.Q <a href="#">4179</a> <a href="#">4180</a> <a href="#">4182</a>                                                                                                                                                     |

Figure S1: Confirmation of purified Optineurin by peptide mass fingerprinting followed by database search.

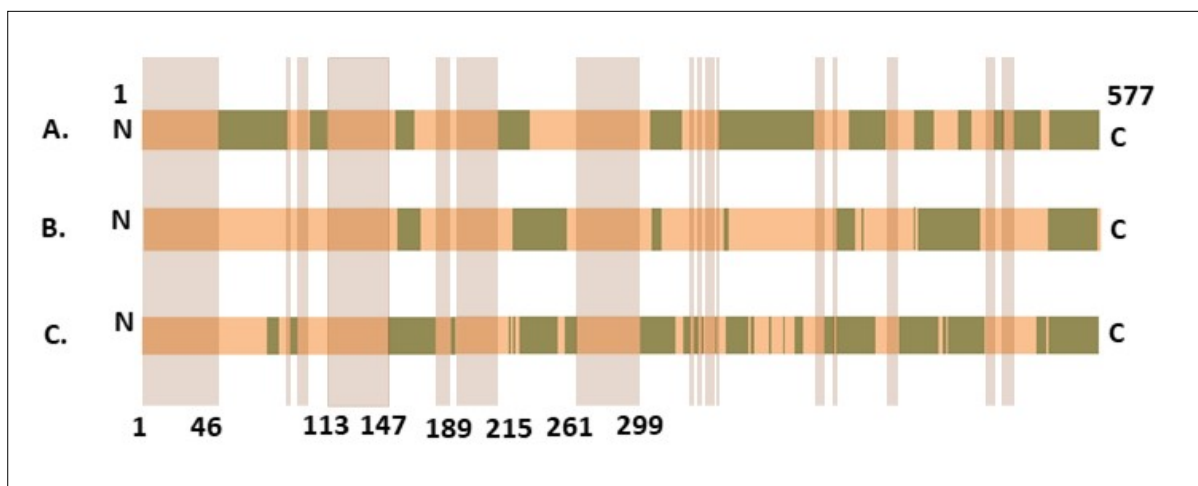

Figure S2: Schematic diagram of intrinsically disordered regions of OPTN; Disordered regions (peach) and ordered regions (olive) were predicted by online software A.PONDRA, B.PONDRA-FIT and C.IUPred2A. The shaded portions show the overlapping stretches of disordered regions by all three softwares.

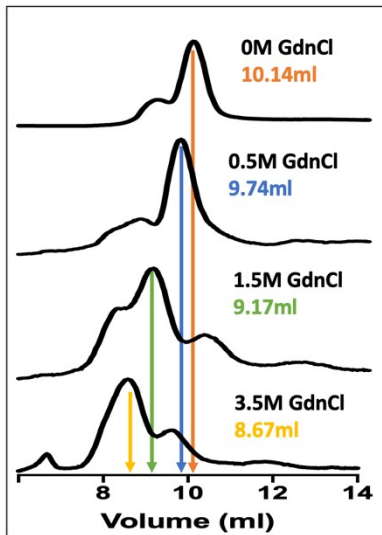

Figure S3: Size exclusion chromatography of Ni-NTA purified OPTN in presence of various concentrations of Guanidine hydrochloride

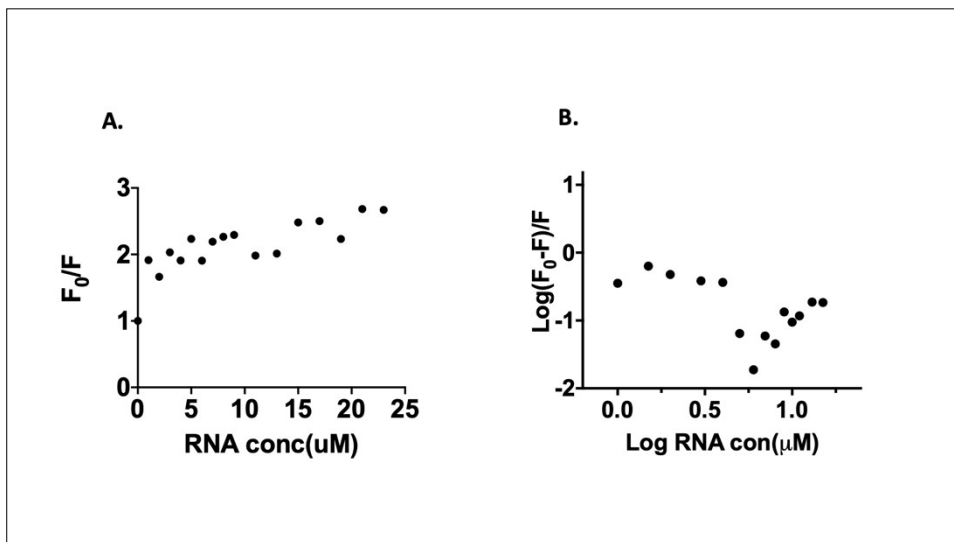

Figure S4: Fluorescence quenching of OPTN at 60 °C in the presence RNA; (A) Stern-Volmer plot of OPTN in the presence of various concentrations of RNA at 60 °C. (B) The plot of  $\log(F_0 - F)/F$  vs  $\log[Q]$  of OPTN at 60 °C as a function of RNA concentration.

OPTN .....  
 HS71A .....MAKAAAIGIDLGTYSVGVFQHGKVEIANDQGNRTTFSYV  
 HS90B MPPEEVHHGEEVETFAFQAEIAQLMSLIINTFYSNKEIFLR...ELISNASDALDKIRYE  
 CRYAA .....  
 CRYBA1 .....  
 CRYGC .....  
 consensus>50 .....

OPTN .....  
 HS71A AFTDTERL.IGDAAKNQVALNPQN.TVFDKRLIGRKFQDPVVQ.SDMKHHWPFQVINDGD  
 HS90B SLTDPSKLDGKELKIDIIIPNPQERTLLVDTGIGMTKADLNNLGTIAKSGTKAFMEAL  
 CRYAA .....  
 CRYBA1 .....  
 CRYGC .....  
 consensus>50 .....

OPTN .....MSHQPLSCLTEKEDSPSSTGN  
 HS71A KPKVQVSYPKGETKAFYPEEL.SSMVLTKMKEIAEAYLGPVTNAVITVPAYFNSQRR  
 HS90B QAGADISMIGQFQGVGFYSAYLVAEKVVVITKHNDDQYAWESSAGGSFTVRADHGPPIGR  
 CRYAA .....  
 CRYBA1 .....  
 CRYGC .....  
 consensus>50 .....e

OPTN .....  
 HS71A GPPHLAH..P.LDFTTPEELLQOMKELLTE..NHQLKEAMKLNAMKGRFEELSAWTEK  
 HS90B ATK.....DAGVIAGLNVLRIINEPTAAAIAYGLDRGKGRVVLIFDLGGGTFDVS  
 CRYAA GTKVILHLKEDQTEYLEERRVKEVVKKHSQFIGYPITLYLEKREKEISD.DEAEEKGE  
 CRYBA1 .....  
 CRYGC .....  
 consensus>50 .....d.....e.q

OPTN .....  
 HS71A QKE...RQFF...IQSKEAKERLMLSHENEKLEELGKLRK...SERSSDPTDDSRLP...AEA...  
 HS90B LTI...DGIF...VKATAGDTHLGGEDFDNRLVNHFEVEFKR...HKKDISQNKRAVRR...TAC...  
 CRYAA KEE...DKDD...EKPKIEDVGSDEEDDSGKDKKKKTKKI...EKYIDQEELNKTPIWT...NP...  
 CRYBA1 .....  
 CRYGC .....  
 consensus>50 .....e.....k.k.....r...e

OPTN .....  
 HS71A EKDQLRTQVVRQAQEKADLLGVSELQKLNSSGSSDSFVEIRMAEGEA...GGSVKEIKHS  
 HS90B AKRTLSSSTQASLEIDSLFEG...DFYTSITRARFEELCSDLFRSTLEPV...KALRDAKLD  
 CRYAA TQEEYGEFYKSLTNDWEDHLAV...KHFSVEGQLEFRALLFIPRRAPFDL...NKKKNNIK  
 CRYBA1 .....  
 CRYGC .....  
 consensus>50 .....i.....r...e

OPTN .....  
 HS71A PGPTRTVSTGTALSKEYRSRSDGAKNYF...HE...TVSQQLLCLREGNQKVERLEVALKEAK  
 HS90B KAQIHDLVLVGG.STRIPKVQKLLQDF...GR...NKSINPD.....EAVAYGAAVQAA  
 CRYAA LYVRRVFI...DELPEYLN...FIRGV...SE...PLNISREMLQQSKILKVIRKNIVKKCL  
 CRYBA1 .....  
 CRYGC .....  
 consensus>50 .....e...dl

OPTN .....  
 HS71A ERVSL...FEKKT...RSEIETQTEGSTTEKENEKGPETVGVSEVALNLQV.TSLFKELQEAH  
 HS90B ILMG...KSENV...LLLDVA...PLSLGLE...TAGGVM TALIKRNSTIPTKQTQIFTTYS  
 CRYAA ELFS...LAEDKE...YKKFYEAPSKNLKGIHEDSTNRRRLSELRLRYHTSQSGDEMTSLSEYV  
 CRYBA1 .....  
 CRYGC .....  
 consensus>50 .....d.....n

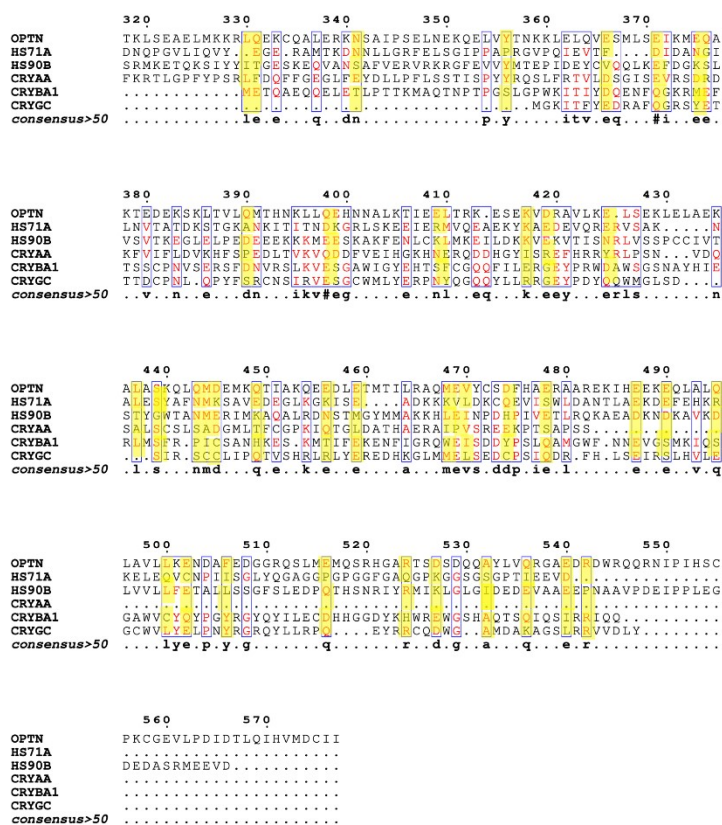

Figure S5: Multiple sequence alignment of human OPTN with HSPs (A) Optineurin (OPTN), (B) heat shock protein 70 (HS71A), (C) heat shock protein 90 (HS90B), (D)  $\alpha$ -crystallin (CRYAA), (E)  $\beta$ -crystallin (CRYBA1) and (F)  $\gamma$ -crystallin (CRYGC). The red-coloured letters depict the similar amino acid residues at the aligned position, while the yellow highlighted portion shows OPTN-specific similarity. The red line spanning the N terminal of OPTN represents the IDR residues in OPTN sequence.

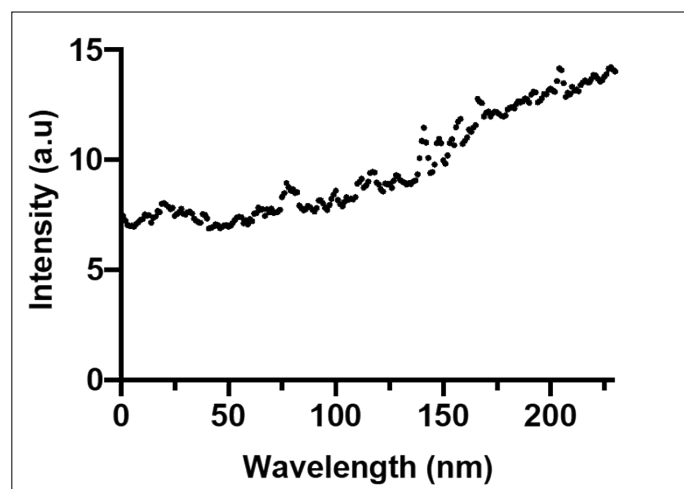

Figure S6: Light scattering profile of only OPTN (3mM) heated at 65 °C.
